# Supplementary material for: Enhancing Maize Yield Simulations in Regional China Using Machine Learning and Multi-Data Resources
Source: MDPI journal article supplement (doi:10.3390/rs16040701), 2024-02-16
Supplement: s1 [file s1]

Archive with 1 entries (1 files):
- remotesensing-2835231-supplementary.pdf
