# Supplementary material for: Enhancing Maize Yield Simulations in Regional China Using Machine Learning and Multi-Data Resources
Source: MDPI journal article supplement (doi:10.3390/rs16040701), 2024-02-16
Supplement: s1 [file s1 › remotesensing-2835231-supplementary.pdf]

# Supplementary

**Table S1.** Basic introduction to the selected GGCMs.

| GGCMs      | Model types | Management scenarios | Irrigation method | Resolution |
|------------|-------------|----------------------|-------------------|------------|
| CLM-CROP   | Ecosystem   | D/F/H                | Irr/Noirr         | 0.5°×0.5°  |
| GEPIC      | Site-based  | D/F/H                | Irr/Noirr         | 0.5°×0.5°  |
| EPIC-TAMU  | Site-based  | F/H                  | Irr/Noirr         | 0.5°×0.5°  |
| EPIC-IIASA | Site-based  | F/H                  | Irr/Noirr         | 0.5°×0.5°  |
| EPIC-BOKU  | Site-based  | D/F/H                | Irr/Noirr         | 0.5°×0.5°  |
| PAPSIM     | Site-based  | D/F/H                | Irr/Noirr         | 0.5°×0.5°  |
| PDSSAT     | Site-based  | D/F/H                | Irr/Noirr         | 0.5°×0.5°  |
| PEGASUS    | Ecosystem   | D/F/H                | Irr/Noirr         | 0.5°×0.5°  |

Notes: D, F, and H represent the “Default” scenario, the “Fullharm” scenario, and the “Harmonn” scenario, respectively.

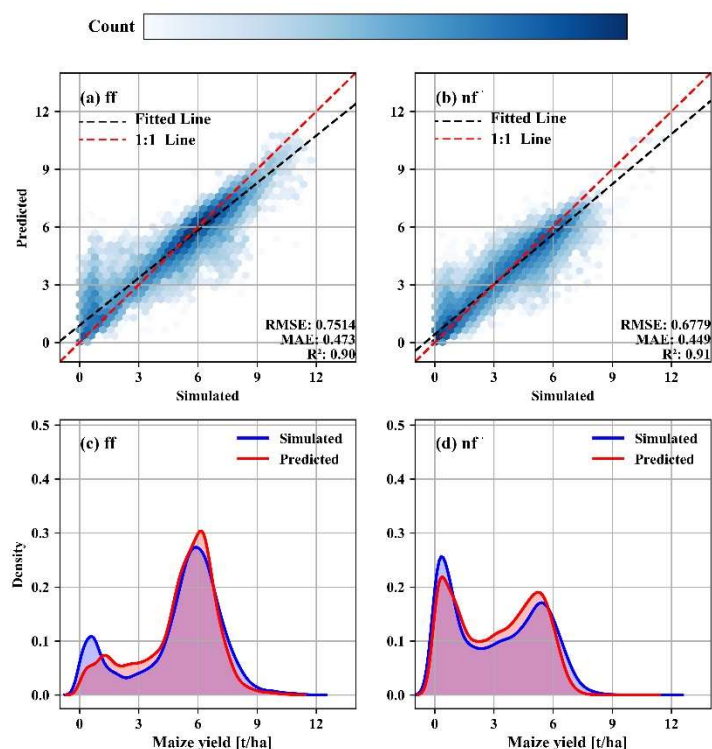

**Figure S1.** Scatter and density plots for EPIC-IIASA simulations and RF-predicted maize yields in the validation dataset. Notes: “ff” represents the irrigated condition, while “nf” represents the rain-fed condition. (a) Maize yield under irrigated conditions; (b) maize yield under rain-fed conditions; (c) density distribution of maize

yield under irrigated conditions; (d) density distribution of maize yield under rain-fed conditions.

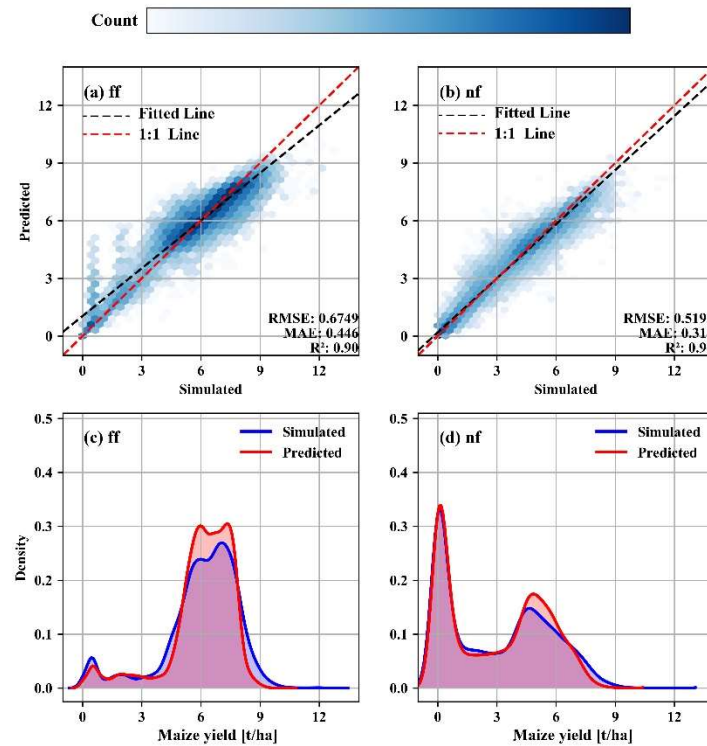

**Figure S2.** Scatter and density plots for EPIC-TAMU simulations and RF-predicted maize yields in the validation dataset.

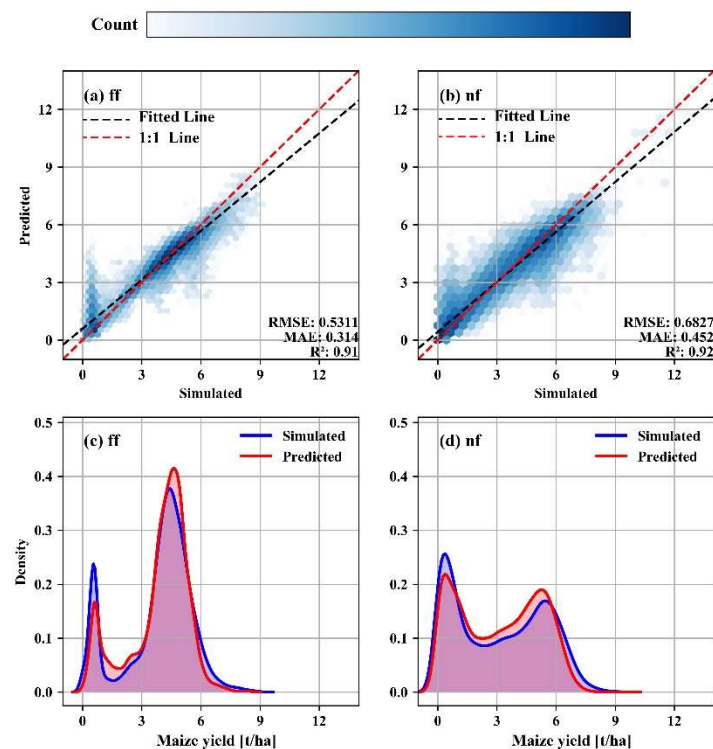

**Figure S3.** Scatter and density plots for PDSSAT simulations and RF-predicted maize yields in the validation dataset.

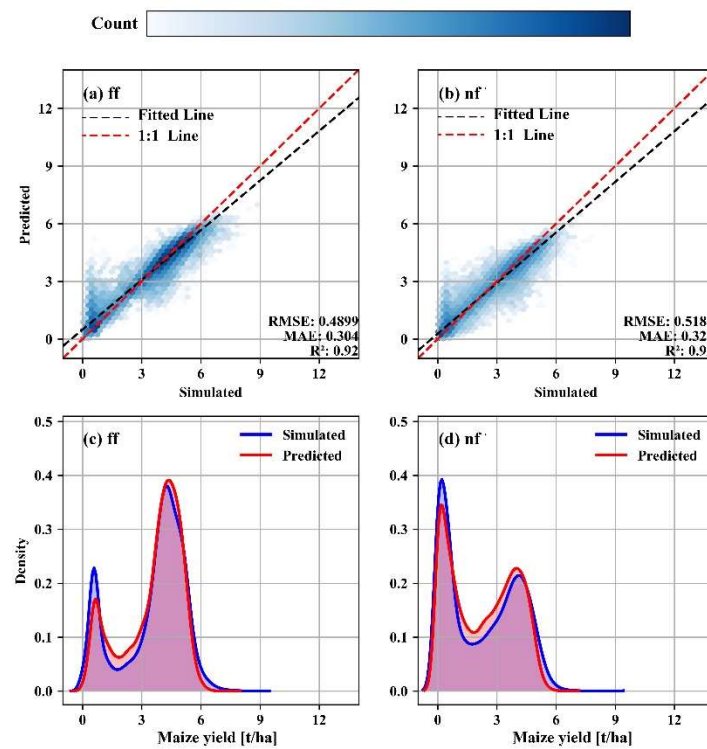

**Figure S4.** Scatter and density plots for GEPIC simulations and RF-predicted maize yields in the validation dataset.

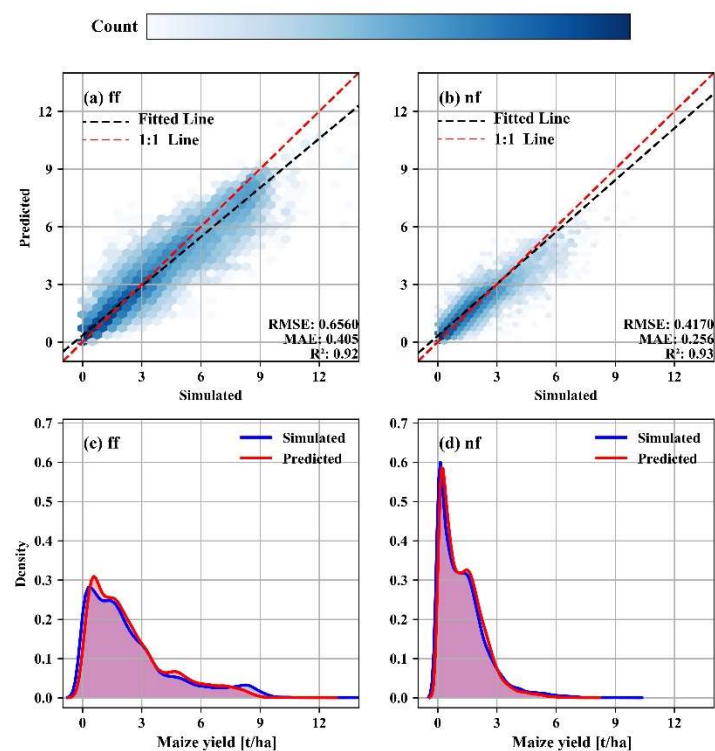

**Figure S5.** Scatter and density plots for PEGASUS simulations and RF-predicted maize yields in the validation dataset.

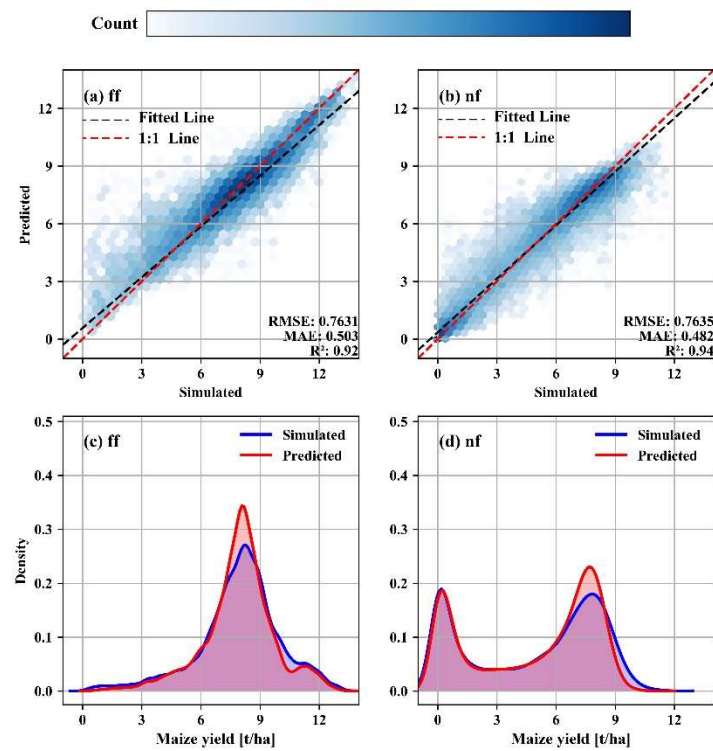

**Figure S6.** Scatter and density plots for CLM-CROP simulations and RF-predicted maize yields in the validation dataset.

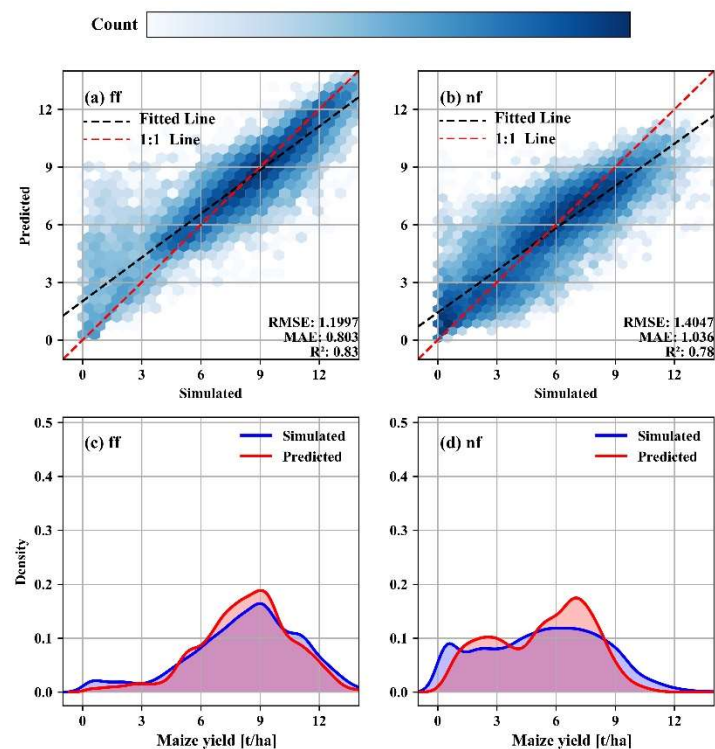

**Figure S7.** Scatter and density plots for PAPSIM simulations and RF-predicted maize yields in the validation dataset.

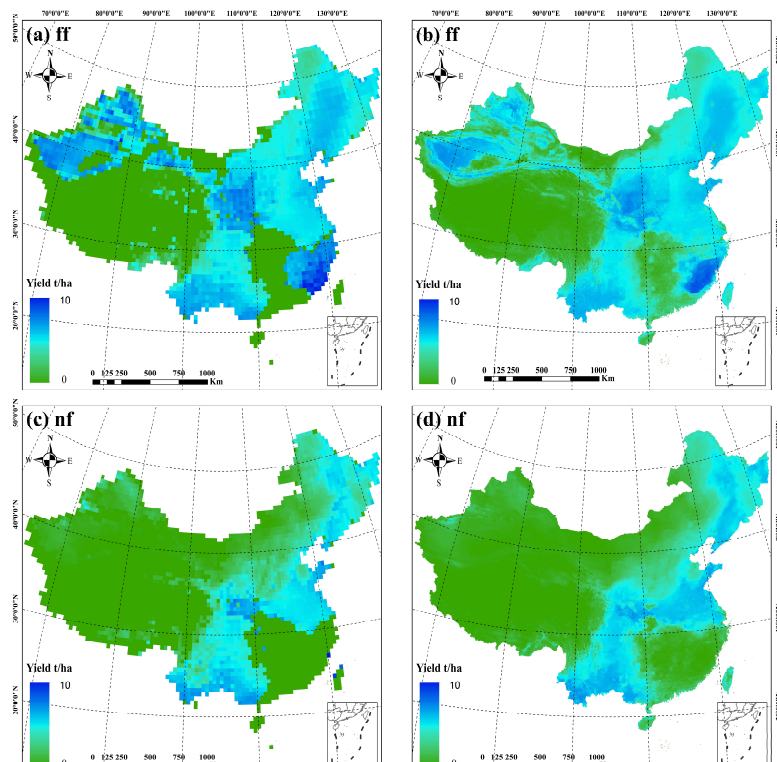

**Figure S8.** Spatial distributions of maize yield in China before and after downscaling for EPIC-IIASA. (a) Ir-rigated maize yield at a spatial resolution of 50 km; (b) irrigated maize yield at a spatial resolution of 1 km; (c) rain-fed maize yield at a spatial resolution of 50 km; and (d) rain-fed maize yield at a spatial resolution of 1 km.

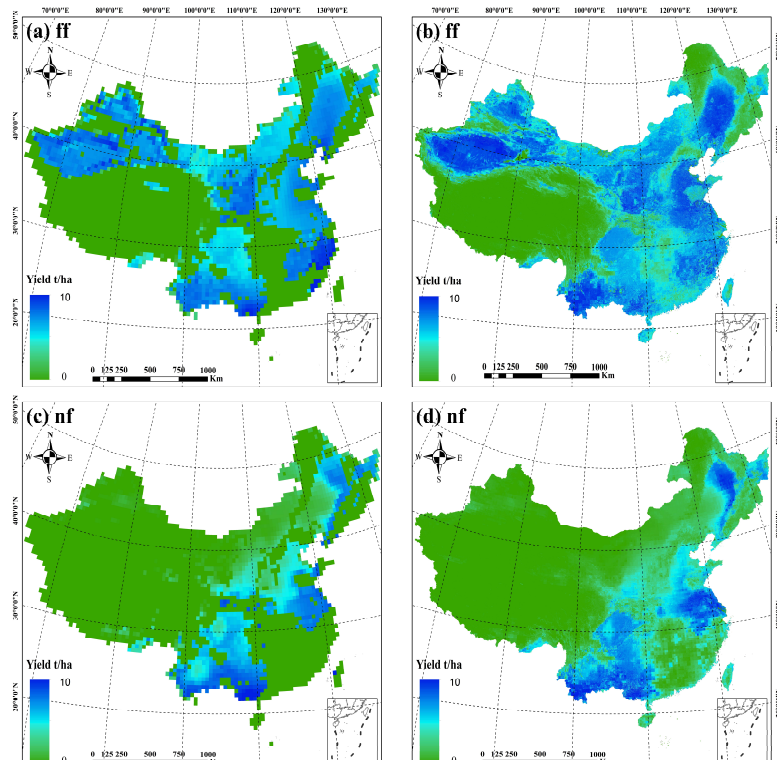

**Figure S9.** Spatial distributions of maize yield in China before and after downscaling for EPIC-TAMU.

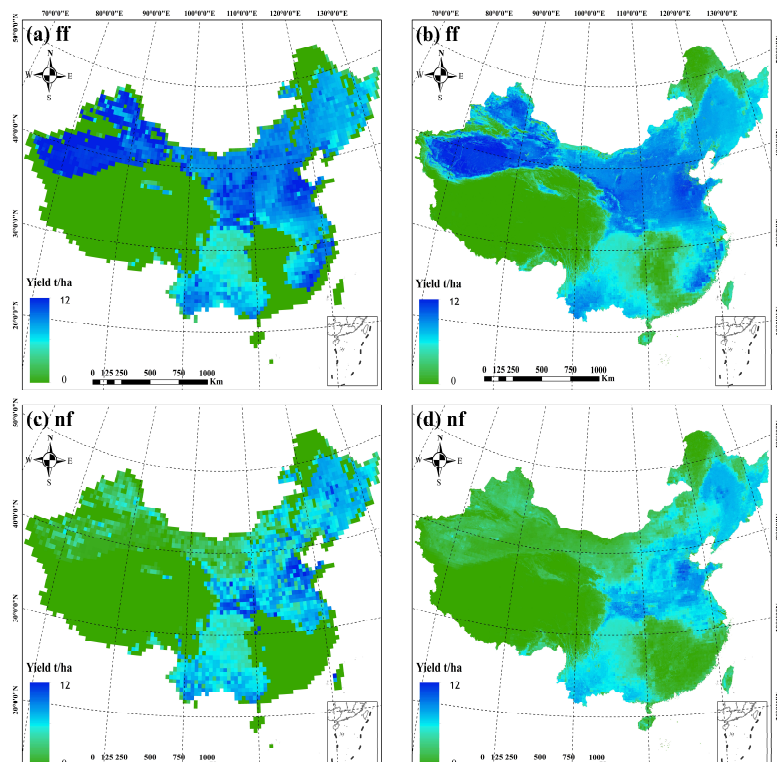

**Figure S10.** Spatial distributions of maize yield in China before and after downscaling for PDSSAT.

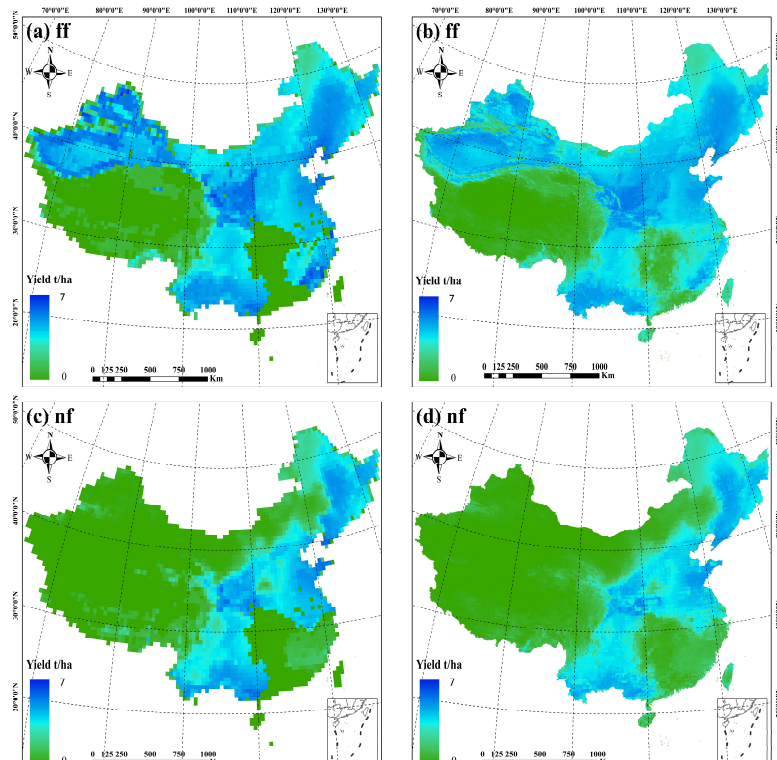

**Figure S11.** Spatial distributions of maize yield in China before and after downscaling for GEPIC.

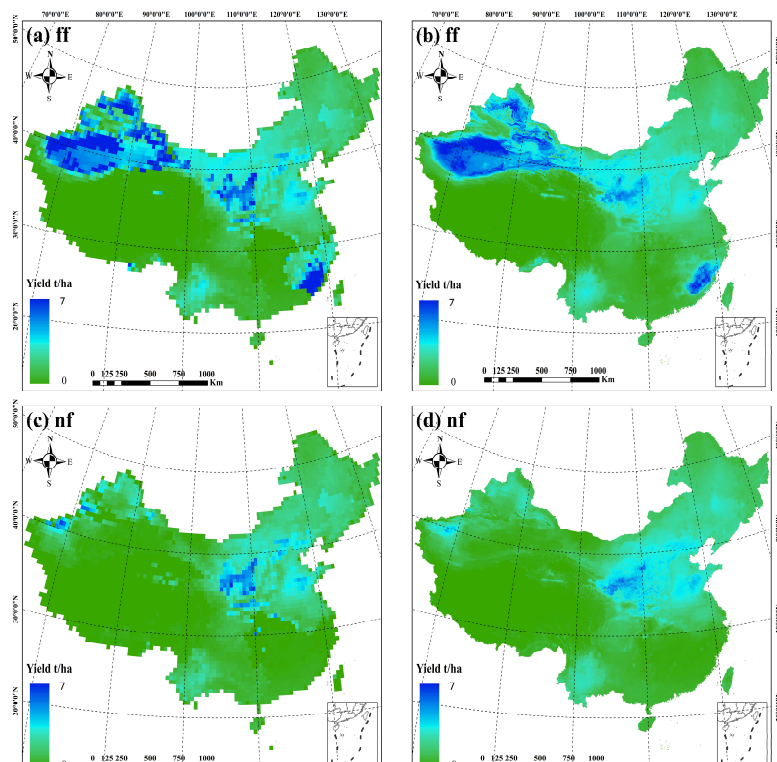

**Figure S12.** Spatial distributions of maize yield in China before and after downscaling for PEGASUS.

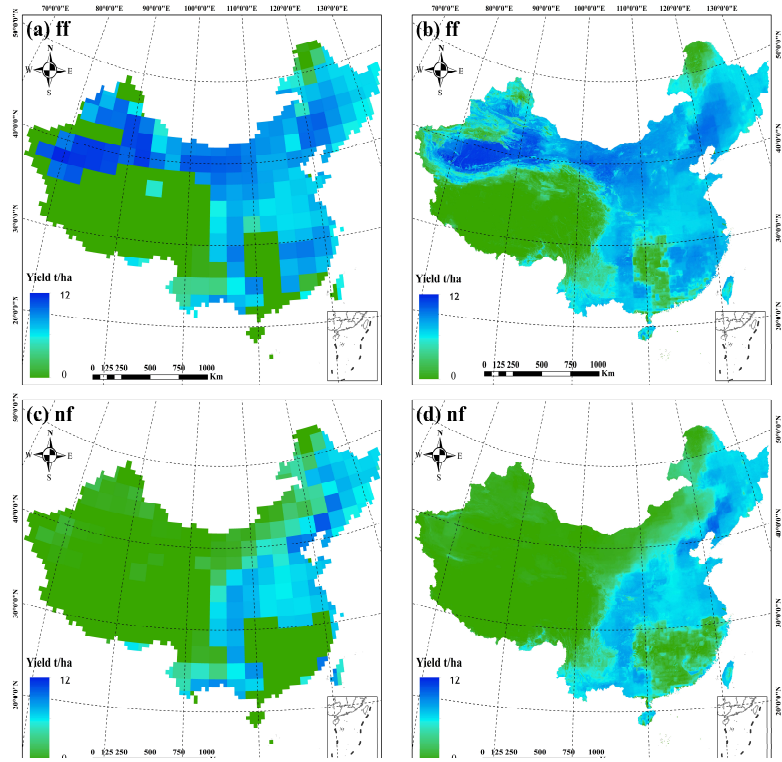

**Figure S13.** Spatial distributions of maize yield in China before and after downscaling for CLM-CROP.

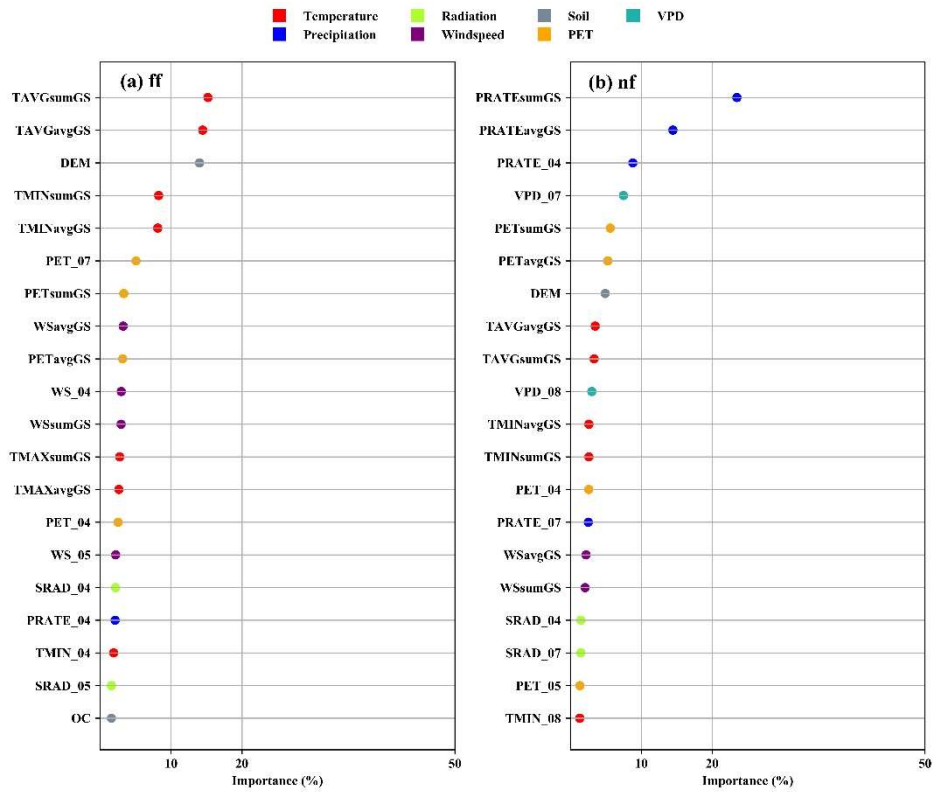

**Figure S14.** Ranking of feature importance for EPIC-IIASA. (a) Feature importance under irrigated conditions; (b) feature importance under rain-fed conditions.

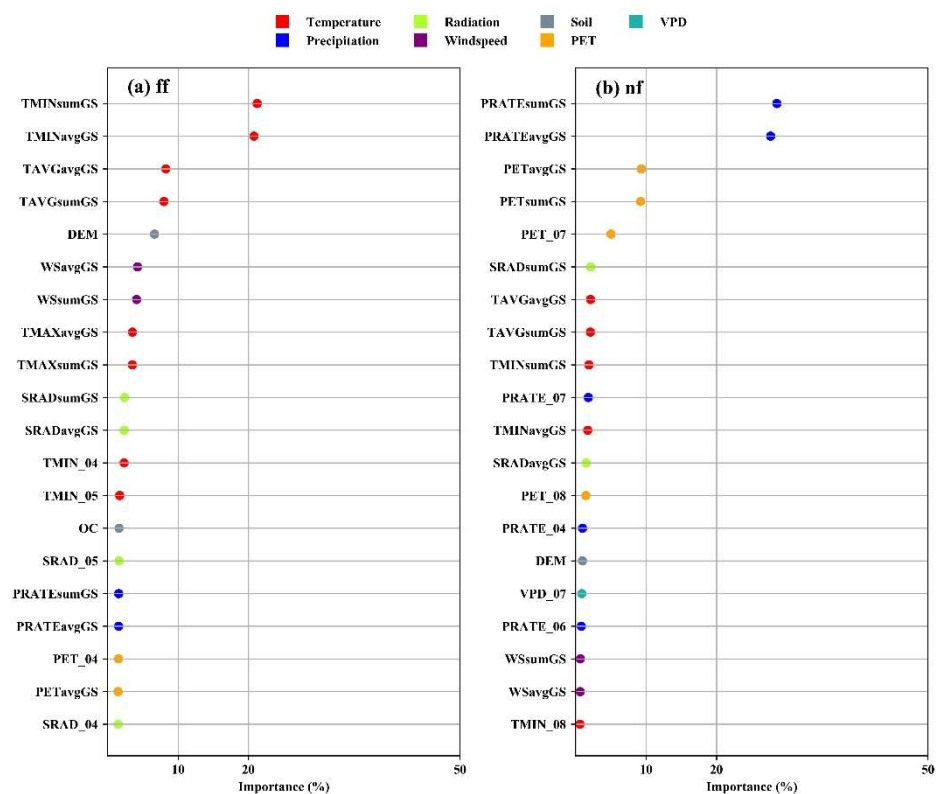

Figure S15. Ranking of feature importance for EPIC-TAMU.

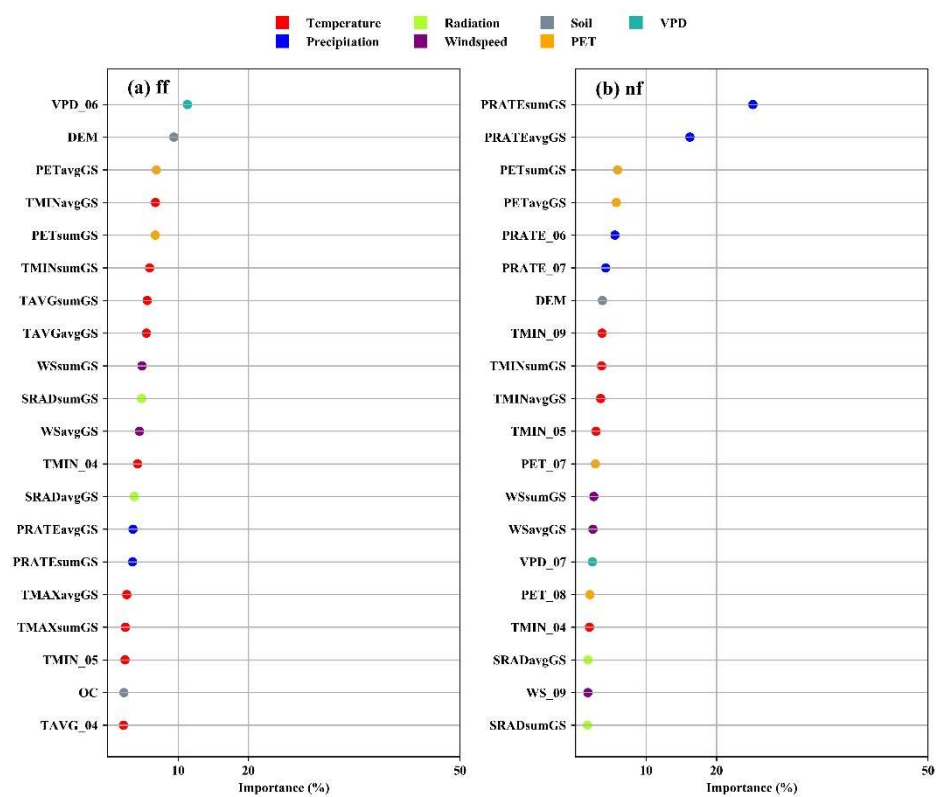

Figure S16. Ranking of feature importance for PDSSAT.

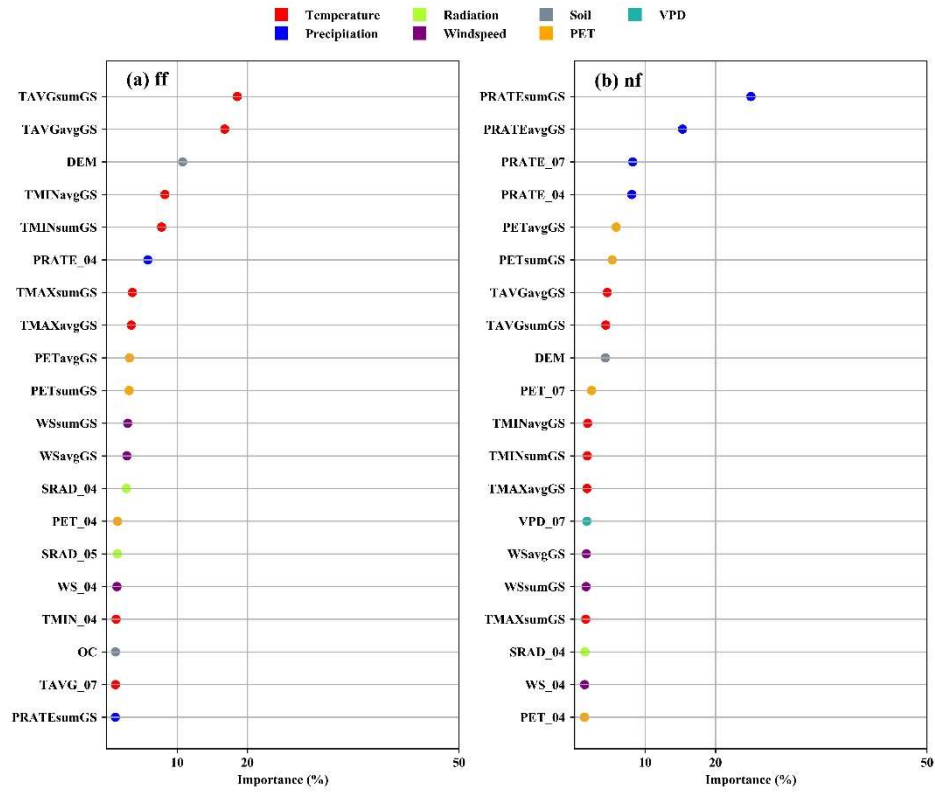

**Figure S17.** Ranking of feature importance for GEPIC.

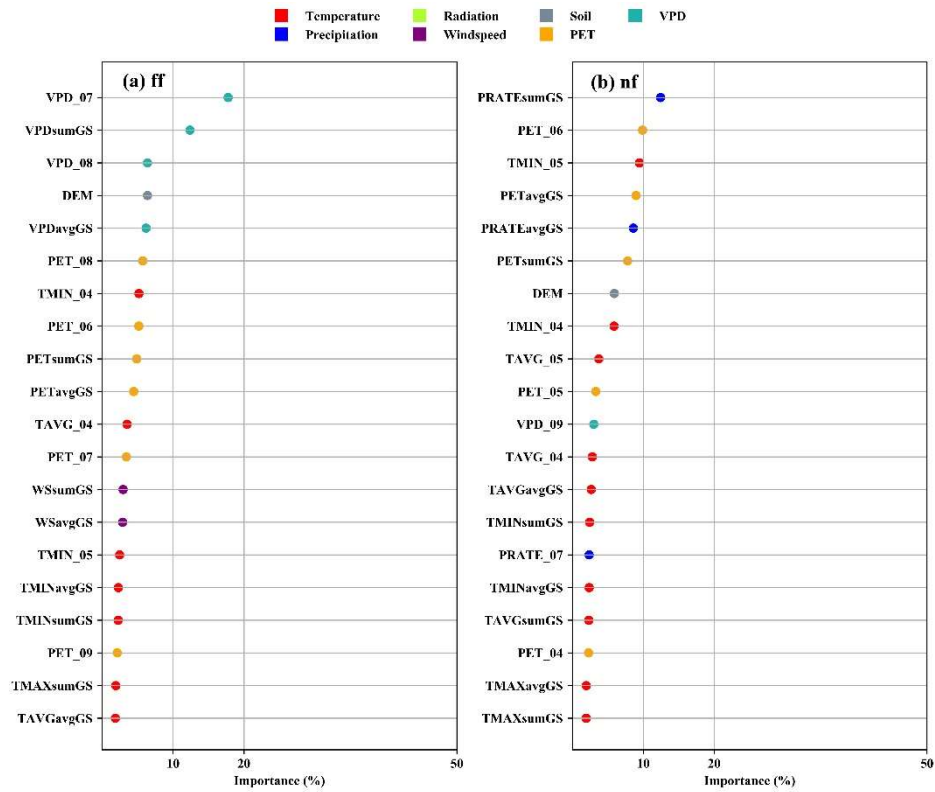

**Figure S18.** Ranking of feature importance for PEGASUS.

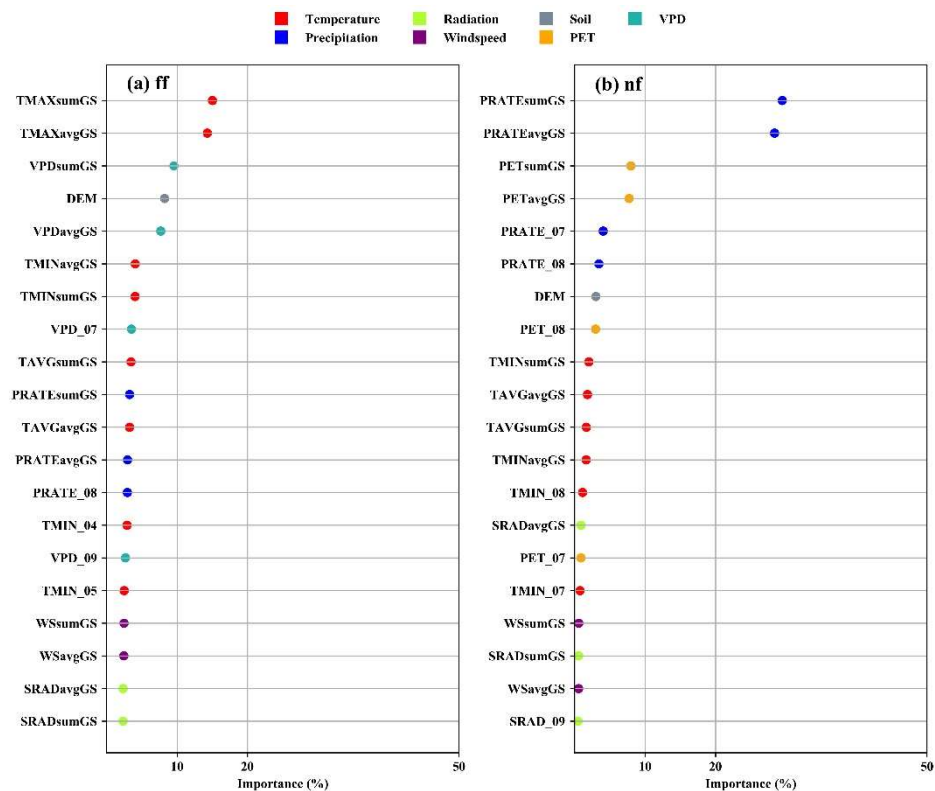

**Figure S19.** Ranking of feature importance for CLM-CROP.
